# Supplementary material for: Xist spatially amplifies SHARP/SPEN recruitment to balance chromosome-wide silencing and specificity to the X chromosome
Source: Springer Nature journal article supplement (doi:10.1038/s41594-022-00739-1), 2022-03-01
Supplement: MOESM1 [file 41594_2022_739_MOESM1_ESM.pdf]

---

**Supplementary information**

---

**Xist spatially amplifies SHARP/SPEN  
recruitment to balance chromosome-wide  
silencing and specificity to the X  
chromosome**

---

In the format provided by the  
authors and unedited

## SUPPLEMENTARY NOTE

### **Xist localization across the X and chromosome-wide silencing**

Previous studies have shown that there are between 60-200 copies of Xist within each nucleus<sup>18,19</sup>. This level of expression is sufficient to drive chromosome-wide silencing across the >1500 genes encoded on the X. Based on these numbers, Xist cannot simultaneously localize to each gene within each cell because there are not enough Xist molecules present; it must instead mediate silencing over several genes at once (**Extended Data Fig. 5a**). As such, Xist localization within individual cells must be heterogenous such that in one cell it localizes at a subset of genes but in another cell, it localizes at a different subset of genes.

Based on ensemble measurements, we know that Xist does not preferentially accumulate at specific sequences (e.g., promoters) but instead localizes broadly across the chromosome (**Extended Data Fig. 5b**). This means that the Xist RNA molecules within each cell must localize randomly at distinct positions spread across the >167 megabases of the chromosome.

Using this information, we can simulate the expected occupancy of Xist across the X within single cells in a manner that would explain the ensemble pattern (**Extended Data Fig. 5b**). We find that the likelihood that Xist is present over any given gene within an individual cell is extremely low (on average <5% of genes per cell would be covered by Xist) (**Extended Data Fig. 5c**). For example, Xist would be expected to localize over any region of *Pgk1* in only ~7% of cells (**Extended Data Fig. 5c**). As such, if Xist-mediated silencing was solely dependent on such localization, we would expect that this gene would remain active in >90% of individual cells. However, using our single cell measurements we observe that this gene is silenced in >87% of single cells (**Extended Data Fig. 4c**). Therefore, these single cell measurements allow us to measure chromosome-wide silencing when focusing on a subset of X chromosome genes.

## SUPPLEMENTARY TABLES

**Table S1. List of plasmids generated and used in this study**

| Plasmid Name                                     | Addgene number (if applicable) | Description                                                                                                         |
|--------------------------------------------------|--------------------------------|---------------------------------------------------------------------------------------------------------------------|
| Cas9-nickase-eGFP (Cas9n-eGFP)                   | 48140                          | eGFP-tagged Cas9n backbone into which four different SHARP-targeting gRNAs were inserted to generate SHARP-KO mESCs |
| SHARP-targeting gRNA plasmid                     | -                              | Cas9n-eGFP backbone containing four different SHARP-targeting gRNAs                                                 |
| FL-SHARP entry clone                             | -                              | Entry clone of full-length SHARP sequence used for Gateway cloning                                                  |
| $\Delta$ RRM-SHARP entry clone                   | -                              | Entry clone of SHARP sequence lacking its RRM (deletion of amino acids 2-590) used for Gateway cloning              |
| $\Delta$ IDR-SHARP entry clone                   | -                              | Entry clone of SHARP sequence lacking its IDR (deletion of amino acids 639-3460) used for Gateway cloning           |
| PB-TAG-ERN                                       | 80476                          | PiggyBac destination vector that was modified prior to Gateway cloning                                              |
| PB-HALO-IRES-NGFR destination vector             | -                              | PiggyBac destination vector used for Gateway cloning containing HALO and NGFR                                       |
| PB-eGFP-IRES-NGFR destination vector             | -                              | PiggyBac destination vector used for Gateway cloning containing eGFP and NGFR                                       |
| FUS-mCherry plasmid                              | 101223                         | Plasmid from which FUS-mCherry fusion was derived to create PB-FUS-mCherry-IRES-NGFR                                |
| PB-FUS-mCherry-IRES-NGFR                         | -                              | PiggyBac destination vector used for Gateway cloning containing FUS-mCherry fusion and NGFR                         |
| HALO-FL-SHARP rescue construct                   | -                              | FL-SHARP entry clone inserted into PB-HALO-IRES-NGFR destination vector                                             |
| HALO- $\Delta$ RRM-SHARP rescue construct        | -                              | $\Delta$ RRM-SHARP entry clone inserted into PB-HALO-IRES-NGFR destination vector                                   |
| HALO- $\Delta$ IDR-SHARP rescue construct        | -                              | $\Delta$ IDR-SHARP entry clone inserted into PB-HALO-IRES-NGFR destination vector                                   |
| eGFP-FL-SHARP rescue construct                   | -                              | FL-SHARP entry clone inserted into PB-eGFP-IRES-NGFR destination vector                                             |
| eGFP- $\Delta$ RRM-SHARP rescue construct        | -                              | $\Delta$ RRM-SHARP entry clone inserted into PB-eGFP-IRES-NGFR destination vector                                   |
| eGFP- $\Delta$ IDR-SHARP rescue construct        | -                              | $\Delta$ IDR-SHARP entry clone inserted into PB-eGFP-IRES-NGFR destination vector                                   |
| FUS-mCherry- $\Delta$ IDR-SHARP rescue construct | -                              | $\Delta$ IDR-SHARP entry clone inserted into PB-FUS-mCherry-IRES-NGFR destination vector                            |
| turboGFP plasmid                                 | 69072                          | Non-targeting plasmid co-transfected with SHARP rescue constructs to enrich for successfully transfected cells      |
| eGFP-EED construct                               | -                              | EED entry clone inserted into PB-eGFP-IRES-NGFR used for imaging in HEK293T cells                                   |
| eGFP-Ptbp1 construct                             | -                              | Ptbp1 entry clone inserted into PB-eGFP-IRES-NGFR used for imaging in HEK293T cells                                 |

**Table S2. List of oligo sequences used in this study (guide RNAs and primers)**

| <b>gRNA</b>   | <b>Target</b> | <b>Top Strand</b>    | <b>Bottom Strand</b> |
|---------------|---------------|----------------------|----------------------|
| gRNA 1        | SHARP         | TCTGGAGTCAGGTGAGACGC | GCGTCTCACCTGACTCCAGA |
| gRNA 2        | SHARP         | GTGAGTGTTTGCTTACACCG | CGGTGTAAGCAAACACTCAC |
| gRNA 3        | SHARP         | CTCGGTTCTTACACAGCTCC | GGAGCTGTGTAAGAACCGAG |
| gRNA 4        | SHARP         | TCTTTGAGCAAGACTCCAAG | CTTGGAGTCTTGCTCAAAGA |
|               |               |                      |                      |
| <b>Method</b> | <b>Target</b> | <b>Sequence_Fw</b>   | <b>Sequence_Rv</b>   |
| gDNA PCR 1    | SHARP WT      | ACACACACGCAATCACACAA | ATGAGTCTCCGGCTCTTCCT |
| gDNA PCR 2    | SHARP KO      | ACACACACGCAATCACACAA | TGAAGCCCTGCATTTAGGAG |
| gDNA PCR 3    | SHARP KO      | AGGCCTATTCCGTCCTGGTA | ATGAGTCTCCGGCTCTTCCT |
|               |               |                      |                      |
| RT-qPCR       | Xist 1        | GCCTCTGATTAGCCAGCAC  | GCAACCCCAGCAATAGTCAT |
| RT-qPCR       | Xist 2        | AGCCAGCACTGATCTCAAGC | GCAACCCCAGCAATAGTCAT |
| RT-qPCR       | GAPDH         | CATGGCCTTCCGTGTTCTTA | GCCTGCTTCACCACCTTCTT |

**Table S3. List of RNA-FISH probes used in this study and corresponding design ID**

| <b>Probe Target</b> | <b>Probe Type</b> | <b>Fluorescent Label</b> | <b>Affymetrix Design ID</b> |
|---------------------|-------------------|--------------------------|-----------------------------|
| Xist                | 4                 | Alexa Fluor 488          | VB4-19746                   |
| Xist                | 6                 | Alexa Fluor 647          | VB6-10824                   |
| Kdm5c               | 1                 | Alexa Fluor 546          | VPYMJG7-01                  |
| Kdm5c               | 4                 | Alexa Fluor 488          | VB4-20659                   |
| Kdm6a               | 1                 | Alexa Fluor 546          | VPZTD24-01                  |
| Pgk1                | 1                 | Alexa Fluor 546          | VB1-6000089                 |
| Atrx                | 6                 | Alexa Fluor 647          | VPNKRFV-06                  |
| Gpc4                | 4                 | Alexa Fluor 488          | VB4-17177                   |
| MeCP2               | 4                 | Alexa Fluor 488          | VPH49TK                     |

## **SUPPLEMENTARY VIDEO LEGENDS**

### **Supplementary Video 1.**

Live imaging of HEK293T cell expressing FL-SHARP labeled with eGFP representing fluorescent intensity over time.

### **Supplementary Video 2.**

Live imaging of HEK293T cell expressing FL-SHARP labeled with eGFP representing 3D surface reconstructions based on fluorescent intensities over time, volume color coded.

### **Supplementary Video 3.**

Live imaging of HEK293T cell expressing  $\Delta$ IDR-SHARP labeled with eGFP representing fluorescent intensity over time.
