# Supplementary figures and images for: Xist spatially amplifies SHARP/SPEN recruitment to balance chromosome-wide silencing and specificity to the X chromosome
Source: Springer Nature journal article supplement (doi:10.1038/s41594-022-00739-1), 2022-03-01

Extended Data Fig. 3a

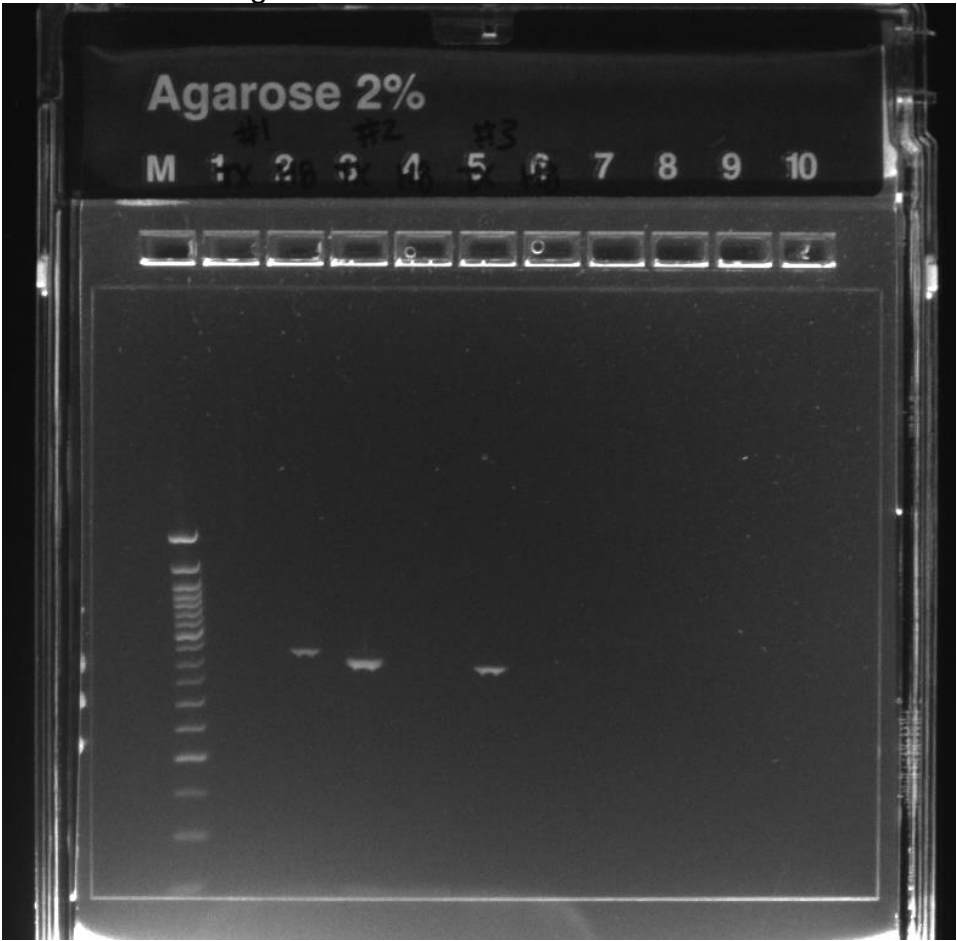

Supplement: MOESM11 [file 41594_2022_739_MOESM11_ESM.pdf]
